# Supplementary material for: The P. aeruginosa effector Tse5 forms membrane pores disrupting the membrane potential of intoxicated bacteria
Source: Springer Nature journal article supplement (doi:10.1038/s42003-022-04140-y), 2022-11-05
Supplement: MOESM2 [file 42003_2022_4140_MOESM2_ESM.pdf]

## Description of Additional Supplementary Files

**File name:** Supplementary Data 1

**Description:** Supplementary Data 1 contains numeric data for charts included within the article.
