# Supplementary material for: The P. aeruginosa effector Tse5 forms membrane pores disrupting the membrane potential of intoxicated bacteria
Source: Springer Nature journal article supplement (doi:10.1038/s42003-022-04140-y), 2022-11-05
Supplement: MOESM3 [file 42003_2022_4140_MOESM3_ESM.xlsx]

## Sheet: Fig. 1a
	OD600
Time (h)	Empty Vector			Empty Vector (Recovered)			Tse5-CT			Tse5-CT (Recovered)			Tse5-CT + Tsi5			Tse5-CT + Tsi5 (Recovered)
0	0.0915254	0.0976271	0.0935593	0.0915254	0.101695	0.0976271	0.0915254	0.0976271	0.0955932	0.099661	0.101695	0.0976271	0.099661	0.103729	0.101695	0.103729	0.103729	0.103729
1	0.0976271	0.105763	0.099661	0.0976271	0.111864	0.105763	0.101695	0.111864	0.105763	0.107797	0.109831	0.103729	0.101695	0.103729	0.103729	0.105763	0.105763	0.103729
2	0.134237	0.152542	0.148475	0.142373	0.170847	0.162712	0.12	0.134237	0.130169	0.124068	0.128136	0.124068	0.115932	0.115932	0.117966	0.117966	0.117966	0.113898
3	0.207458	0.223729	0.229831	0.219661	0.244068	0.233898	0.148475	0.168814	0.176949	0.148475	0.15661	0.158644	0.136271	0.142373	0.148475	0.142373	0.142373	0.142373
4	0.331525	0.343729	0.374237	0.335593	0.412881	0.376271	0.183051	0.199322	0.207458	0.185085	0.199322	0.20339	0.178983	0.19322	0.201356	0.185085	0.191186	0.189153
5	0.524746	0.486102	0.538983	0.490169	0.490169	0.52678	0.260339	0.278644	0.28678	0.252203	0.270508	0.288814	0.262373	0.27661	0.294915	0.278644	0.280678	0.278644
6	0.687458	0.642712	0.695593	0.642712	0.63661	0.67322	0.353898	0.388475	0.404746	0.357966	0.374237	0.402712	0.39661	0.404746	0.439322	0.423051	0.418983	0.416949
7	0.833898	0.772881	0.837966	0.768814	0.754576	0.799322	0.492203	0.510508	0.534915	0.490169	0.486102	0.518644	0.545085	0.530847	0.585763	0.56339	0.567458	0.583729
8	0.99661	0.909153	1.00068	0.892881	0.860339	0.931525	0.626441	0.630508	0.663051	0.620339	0.593898	0.642712	0.671186	0.634576	0.707797	0.695593	0.707797	0.734237
9	1.12881	1.03119	1.14102	0.998644	0.976271	1.07593	0.68339	0.681356	0.697627	0.681356	0.650847	0.677288	0.772881	0.695593	0.805424	0.811525	0.807458	0.837966
10	1.16339	1.08407	1.20407	1.03119	1.01492	1.09831	0.593898	0.581695	0.630508	0.614237	0.575593	0.620339	0.833898	0.76678	0.844068	0.831864	0.882712	0.915254
11	1.30169	1.21017	1.36475	1.15729	1.16949	1.24475	0.561356	0.569492	0.624407	0.604068	0.614237	0.705763	0.931525	0.903051	0.96	0.91322	1.01288	1.03729
12	1.43593	1.33831	1.47458	1.28542	1.28339	1.36068	0.524746	0.55322	0.530847	0.561356	0.506441	0.557288	1.11254	0.978305	1.05763	1.16542	1.12678	1.14508
13	1.53153	1.40136	1.57831	1.36678	1.36678	1.4461	0.496271	0.461695	0.573559	0.477966	0.449492	0.508475	1.12475	1.02712	1.12068	1.08407	1.19186	1.21627
14	1.59458	1.41356	1.59864	1.81424	1.75525	1.99729	0.459661	0.475932	0.488136	0.502373	0.473898	0.567458	1.11458	1.0678	1.13288	1.13898	1.18373	1.22034
15	1.6861	1.51729	1.70644	1.86305	1.85085	2.07051	0.439322	0.494237	0.445424	0.494237	0.469831	0.48	1.06169	1.05153	1.12475	1.24475	1.29153	1.3322
16	1.79186	1.60068	1.8122	1.82034	1.91797	2.09695	0.467797	0.48	0.484068	0.482034	0.687458	0.473898	1.08203	0.990508	1.12678	1.38712	1.53966	1.41763

## Sheet: Fig. 1b
	Log10(CFU*mL-1)
Time (h)	Empty Vector			Empty Vector (Recovered)			Tse5-CT			Tse5-CT (Recovered)			Tse5-CT + Tsi5			Tse5-CT + Tsi5 (Recovered)
0	5.81291	5.39794	5.30103	5.69897	4.69897	5.17609	3.39794	3	3.69897	3	3	3.69897	7.39794	6.60206	6.47712	6.92942	6.77815	5.65321
2	6.90309	6.30103	6.65321	6.65321	5.69897	6.60206	3.39794	3.69897	4	3.65321	3.69897	4.30103	8.8451	8	8.17609	8.69897	8	8.30103
4	8.07918	7.54407	7.54407	7.17609	7.87506	7.74036	4.30103	3.69897	4.60206	4	4.17609	4.60206	8.17609	8.39794	8.95424	8.39794	8.17609	8.87506
6	8	8.69897	8.54407	8	8.54407	8.47712	4.69897	4.69897	4.17609	4.69897	4.69897	3.69897	8.69897	8.47712	9.17609	8.69897	8.39794	9
8	9.47712	8.69897	9	9.17609	9.30103	8.69897	5.30103	5.77815	5.77815	5.47712	5.17609	5.8451	9.60206	9.47712	10.1761	9.39794	9.47712	9.60206
10	8.69897	9.39794	8.69897	8.69897	9.09691	8.39794	4.47712	3.69897	4	4.54407	3.69897	3.69897	10.3979	9.69897	10	10	10.0212	9.87506
12	8.60206	8.97772	9.07918	9.17609	9.87506	9.54407	3.69897	2.69897	2.69897	3.69897	3.69897	2.69897	9.69897	10.5441	10.1761	10	10.301	10
14	10.0969	9.60206	9.54407	9.81291	9.60206	10.2041	3.69897	2.69897	1.69897	3.69897	2.69897	2.69897	9.69897	10.5441	10	9.69897	10.3979	10
16	10.0212	9.54407	10.0414	10.301	9.69897	10	2.69897	2.69897	1.69897	2.69897	3.17609	2.17609	10.3979	11.1761	10.699	10.699	11.301	11.1761

## Sheet: Fig. 2a
	Healthy cells
	EV			Tse5-CT (+)			sp-Tse5-CT (+)			Heat Shock			Polymixyn B
Total cells (%)	82.97	81.41	80.28	33.8	29.68	33.52	58.41	62.96	61.34	20.86	15.12	20.44	15.9	5.66	5.84

## Sheet: Fig. 2b
	Depolarized cells
	EV			Tse5-CT (+)			sp-Tse5-CT (+)			Heat Shock			Polymixyn B
Total cells (%)	82.97	81.41	80.28	33.8	29.68	33.52	58.41	62.96	61.34	0.21	0.1	0.11	83.65	94.06	93.96

## Sheet: Fig. 2c
	Permeabilized cells
	EV			Tse5-CT (+)			sp-Tse5-CT (+)			Heat Shock			Polymixyn B
Total cells (%)	0.02	0.02	0.04	0.01	0.02	0.02	0.04	0.02	0.05	78.72	78.33	82.56	0.01	0.01	0.02

## Sheet: Fig. 2d
	Depolarized + Permeabilized cells
	EV			Tse5-CT (+)			sp-Tse5-CT (+)			Heat Shock			Polymixyn B
Total cells (%)	0.34	0.61	0.3	0.98	3.52	2.76	2.46	2.6	0.52	0.63	0.81	2.32	0.44	0.27	0.19

## Sheet: Fig. 3a
	Healthy cells
	Negative control			Tse5-CT (+)			Tse5-CT & Tsi5 (+)			Heat Shock			Polymixyn B
Total cells (%)	68.73	67.16	66.78	22.8	29.68	33.52	65.42	67.69	64.05	20.86	15.12	20.44	15.9	5.66	5.84

## Sheet: Fig. 3b
	Depolarized cells
	Negative control			Tse5-CT (+)			Tse5-CT & Tsi5 (+)			Heat Shock			Polymixyn B
Total cells (%)	30.15	31.77	32.47	63.17	67.54	61.69	31.4	31.56	33.49	0.21	0.1	0.11	83.65	94.06	93.96

## Sheet: Fig. 4a
Time	ΔΠ (Exp1)	ΔΠ (Exp2)	ΔΠ (Exp3)
0	0.542
0.24	0.505
0.48	0.485
0.72	0.525
0.96	0.535
1.2	0.564
1.44	0.546
1.68	0.568
1.92	0.556
2.16	0.557
2.64	0.563
2.88	0.573
3.12	0.597
3.35	0.613
3.59	0.62
3.83	0.599
4.07	0.588
4.31	0.562
4.55	0.57
4.79	0.549
5.03	0.561
5.27	0.54
5.51	0.522
5.75	0.537
5.99	0.548
6.23	0.553
6.47	0.545
6.71	0.542
6.95	0.564
7.19	0.533
7.43	0.556
7.67	0.533
7.91	0.516
8.39	0.505
8.63	0.527
8.87	0.535
9.11	0.542
9.35	0.553
9.59	0.559
9.83	0.558
10.07	0.558
10.31	0.577
10.55	0.573
10.79	0.576
11.02	0.565
11.26	0.565
11.5	0.558
11.74	0.539
11.98	0.566
12.22	0.574
12.46	0.545
12.7	0.548
12.94	0.518
13.18	0.505
13.42	0.497
13.66	0.531
14.14	0.529
14.38	0.526
14.62	0.534
14.86	0.544
15.1	0.545
15.34	0.568
15.58	0.583
15.82	0.606
16.06	0.636
16.3	0.63
16.54	0.624
16.78	0.587
17.02	0.58
17.26	0.578
17.5	0.581
17.74	0.598
17.98	0.608
18.22	0.58
18.46	0.597
18.7	0.608
18.93	0.637
19.17	0.602
19.41	0.629
19.89	0.608
20.13	0.609
20.37	0.567
20.61	0.569
20.85	0.539
21.09	0.519
21.33	0.509
21.57	0.532
21.81	0.531
22.05	0.522
22.29	0.529
22.53	0.517
22.77	0.523
23.01	0.5
23.25	0.491
23.49	0.504
23.73	0.535
23.97	0.527
24.21	0.537
24.45	0.522
24.69	0.547
24.93	0.508
25.17	0.503
25.41	0.496
25.89	0.512
26.13	0.505
26.37	0.533
26.61	0.518
26.84	0.522
27.08	0.519
27.32	0.519
27.56	0.515
27.8	0.489
28.04	0.484
28.28	0.465
28.52	0.473
28.76	0.492
29	0.517
29.24	0.506
29.48	0.506
29.72	0.5
29.96	0.506
30.2	0.48
30.44	0.503
30.68	0.505
30.92	0.523
31.16	0.508
31.64	0.514
31.88	0.492
32.12	0.522
32.36	0.547
32.6	0.564
32.84	0.559
33.08	0.575
33.32	0.551
33.56	0.535
33.8	0.499
34.04	0.479
34.28	0.48
34.52	0.488
34.75	0.507
34.99	0.511
35.23	0.502
35.47	0.483
35.71	0.494
35.95	0.492
36.19	0.506
36.43	0.505
36.67	0.521
36.91	0.509
37.39	0.494
37.63	0.487
37.87	0.491
38.11	0.48
38.35	0.514
38.59	0.511
38.83	0.515
39.07	0.479
39.31	0.477
39.55	0.483
39.79	0.496
40.03	0.505
40.27	0.518
40.51	0.503
40.75	0.465
40.99	0.459
41.23	0.459
41.47	0.468
41.71	0.473
41.95	0.486
42.2	0.45
42.44	0.43
42.68	0.401
42.92	0.416
43.16	0.406
43.64	0.447
43.88	0.445
44.12	0.453
44.36	0.442
44.6	0.45
44.84	0.445
45.08	0.451
45.33	0.438
45.57	0.428
45.81	0.425
46.07	0.436
46.31	0.444
46.54	0.438
46.78	0.436
47.02	0.429
47.28	0.446
47.52	0.419
47.76	0.395
48	0.393
48.24	0.389
48.48	0.382
48.73	0.397
48.97	0.386
49.21	0.393
49.45	0.396
49.69	0.405
49.93	0.394
50.17	0.412
50.41	0.386
50.89	0.397
51.13	0.366
51.37	0.37
51.62	0.38
51.86	0.403
52.12	0.413
52.36	0.398
52.61	0.401
52.85	0.395
53.09	0.411
53.33	0.417
53.57	0.386
53.81	0.362
54.05	0.359
54.29	0.368
54.53	0.413
54.77	0.413
55.01	0.433
55.25	0.407
55.49	0.4
55.73	0.364
55.97	0.365
56.21	0.382
56.45	0.384
56.69	0.383
56.93	0.392
57.17	0.367
57.65	0.377
57.89	0.376
58.13	0.363
58.36	0.359
58.6	0.366
58.84	0.392
59.08	0.379
59.32	0.373
59.56	0.394
59.8	0.379
60.04	0.375
60.28	0.383
60.54	0.37
60.78	0.369
61.02	0.354
61.26	0.368
61.51	0.355
61.75	0.353
62.01	0.344
62.24	0.365
62.5	0.354
62.74	0.372
62.98	0.374
63.22	0.371
63.46	0.367
63.7	0.357
63.94	0.369
64.18	0.397
64.42	0.401
64.66	0.395
65.14	0.375
65.38	0.362
65.62	0.361
65.86	0.371
66.09	0.381
66.33	0.364
66.57	0.365
66.81	0.34
67.05	0.343
67.29	0.321
67.53	0.33
67.77	0.334
68.01	0.365
68.25	0.351
68.49	0.356
68.73	0.347
68.97	0.353
69.21	0.326
69.45	0.331
69.69	0.338
69.95	0.354
70.18	0.368
70.42	0.4
70.66	0.419
71.14	0.411
71.4	0.39
71.65	0.391
71.89	0.389
72.13	0.382
72.39	0.353
72.63	0.287
72.87	0.264
73.11	0.257
73.35	0.297
73.59	0.28
73.83	0.301
74.06	0.279
74.3	0.304
74.54	0.295
74.78	0.299
75.02	0.296
75.26	0.294
75.5	0.298
75.74	0.308
75.98	0.337
76.22	0.352
76.46	0.338
76.7	0.331
76.94	0.328
77.18	0.319
77.42	0.329
77.66	0.321
78.14	0.298
78.38	0.28
78.62	0.286
78.86	0.299
79.1	0.321
79.34	0.306
79.58	0.293
79.82	0.265
80.06	0.275
80.3	0.257
80.55	0.273
80.79	0.28
81.03	0.298
81.29	0.275
81.54	0.287
81.78	0.286
82.03	0.3
82.27	0.29
82.51	0.277
82.75	0.259
82.99	0.264
83.23	0.292
83.47	0.34
83.71	0.341
83.95	0.321
84.19	0.296
84.43	0.289
84.67	0.3
84.91	0.288
85.39	0.297
85.63	0.26
85.87	0.276
86.11	0.256
86.35	0.276
86.59	0.273
86.83	0.289
87.07	0.278
87.31	0.295
87.55	0.29
87.79	0.277
88.03	0.261
88.27	0.252
88.51	0.255
88.75	0.266
88.99	0.254
89.23	0.261
89.47	0.261
89.71	0.285
89.94	0.294
90.18	0.3
90.42	0.318
90.66	0.296
91.14	0.281
91.38	0.274
91.62	0.291
91.86	0.278
92.1	0.283
92.34	0.258
92.58	0.27
92.82	0.261
93.06	0.322
93.3	0.348
93.54	0.374
93.78	0.399
94.02	0.41
94.26	0.397
94.5	0.397
94.74	0.384
94.98	0.35
95.22	0.353
95.46	0.349
95.7	0.334
95.94	0.32
96.18	0.293
96.42	0.261
96.66	0.243
97.14	0.207
97.38	0.23
97.62	0.238
97.85	0.264
98.09	0.25
98.33	0.259
98.57	0.23
98.81	0.244
99.05	0.224
99.29	0.258
99.53	0.273
99.77	0.282
100.01	0.252
100.25	0.248
100.49	0.261
100.73	0.304
100.97	0.29
101.21	0.245
101.45	0.232
101.69	0.243
101.93	0.261
102.17	0.284
102.41	0.29
102.89	0.287
103.13	0.312
103.37	0.282
103.61	0.292
103.85	0.285
104.09	0.265
104.33	0.229
104.57	0.237
104.81	0.235
105.05	0.266
105.29	0.267
105.52	0.27
105.76	0.259
106	0.279
106.24	0.295
106.48	0.287
106.72	0.286
106.96	0.278
107.2	0.255
107.44	0.281
107.68	0.301
107.92	0.325
108.16	0.34
108.64	0.336
108.88	0.344
109.12	0.307
109.36	0.282
109.61	0.264
109.85	0.274
110.09	0.281
110.33	0.287
110.57	0.303
110.81	0.338
111.05	0.34
111.29	0.335
111.55	0.329
111.79	0.326
112.03	0.304
112.28	0.314
112.54	0.295
112.78	0.316
113.02	0.311
113.26	0.302
113.49	0.289
113.73	0.28
113.97	0.276
114.21	0.295
114.45	0.29
114.69	0.267
114.93	0.242
115.17	0.236
115.41	0.243
115.89	0.219
116.13	0.239
116.37	0.228
116.61	0.242
116.85	0.233
117.09	0.243
117.33	0.234
117.57	0.251
117.81	0.271
118.06	0.308
118.3	0.254
118.54	0.215
118.78	0.194
119.02	0.2
119.26	0.212
119.5	0.228
119.74	0.216
119.98	0.219
120.22	0.219
120.46	0.224
120.7	0.24
120.96	0.238
121.2	0.221
121.43	0.169
121.67	0.178
121.93	0.18
122.17	0.194
122.41	0.204
122.66	0.24
123.14	0.215
123.38	0.211
123.62	0.18
123.86	0.198
124.1	0.182
124.34	0.2
124.58	0.21
124.82	0.196
125.06	0.186
125.3	0.192
125.54	0.187
125.78	0.237
126.02	0.257
126.26	0.255
126.5	0.272
126.74	0.281
126.98	0.275
127.22	0.261
127.47	0.25
127.73	0.22
127.97	0.209
128.22	0.187
128.48	0.194
128.72	0.185
128.96	0.18
129.19	0.162
129.43	0.178
129.67	0.166
129.91	0.174
130.39	0.162
130.65	0.154
130.89	0.13
131.13	0.141
131.37	0.135
131.61	0.143
131.85	0.161
132.09	0.183
132.33	0.175
132.57	0.15
132.81	0.147
133.05	0.143
133.28	0.147
133.52	0.144
133.76	0.154
134	0.152
134.24	0.172
134.48	0.143
134.72	0.149
134.96	0.142
135.2	0.162
135.44	0.158
135.68	0.168
135.92	0.154
136.16	0.154
136.64	0.147
136.88	0.167
137.12	0.165
137.37	0.15
137.61	0.133
137.87	0.137
138.11	0.13
138.35	0.15
138.6	0.152
138.84	0.157
139.08	0.15
139.32	0.139
139.56	0.162
139.8	0.171
140.04	0.174
140.28	0.154
140.52	0.13
140.78	0.102
141.02	0.114
141.25	0.115
141.49	0.129
141.73	0.131
141.97	0.126
142.21	0.132
142.45	0.14
142.69	0.131
142.93	0.123
143.17	0.113
143.43	0.134
143.68	0.13
143.92	0.126
144.18	0.124
144.42	0.125
144.9	0.124
145.15	0.126
145.4	0.128
145.66	0.121
145.9	0.121
146.15	0.098
146.39	0.111
146.63	0.094
146.87	0.124
147.13	0.14
147.37	0.181
147.61	0.213
147.85	0.235
148.09	0.209
148.33	0.214
148.57	0.192
148.81	0.162
149.04	0.152
149.28	0.134
149.52	0.104
149.76	0.098
150	0.093
150.24	0.116
150.5	0.085
150.74	0.053
150.99	0.062
151.23	0.076
151.49	0.086
151.73	0.082
151.97	0.106
152.21	0.121
152.45	0.139
152.69	0.097
152.92	0.079
153.16	0.043
153.64	0.058
153.88	0.067
154.12	0.071
154.36	0.081
154.6	0.109
154.84	0.104
155.08	0.12
155.32	0.09
155.56	0.098
155.8	0.101
156.04	0.147
156.28	0.162
156.52	0.141
156.76	0.104
157	0.077
157.25	0.059
157.49	0.075
157.73	0.115
157.97	0.115
158.21	0.116
158.45	0.099
158.69	0.098
158.93	0.061
159.17	0.062
159.43	0.079
159.67	0.097
159.91	0.079
160.16	0.073
160.64	0.056
160.88	0.059
161.12	0.078
161.37	0.102
161.61	0.089
161.85	0.103
162.09	0.095
162.33	0.111
162.57	0.106
162.81	0.096
163.05	0.093
163.29	0.08
163.53	0.09
163.79	0.089
164.03	0.092
164.27	0.088
164.51	0.081
164.75	0.06
164.98	0.052
165.22	0.038
165.46	0.054
165.7	0.061
165.94	0.088
166.18	0.097
166.42	0.1
166.66	0.067
166.92	0.045
167.16	0.027
167.64	0.059
167.88	0.076
168.12	0.123
168.36	0.133
168.6	0.108
168.83	0.044
169.07	0.021
169.31	0.03
169.55	0.048
169.79	0.076
170.03	0.079
170.27	0.08
170.51	0.061
170.75	0.046
170.99	0.038
171.23	0.064
171.49	0.122
171.73	0.194
171.98	0.205
172.22	0.186
172.46	0.154
172.7	0.176
172.94	0.182
173.18	0.208
173.42	0.159
173.66	0.175
174.14	0.199
174.38	0.174
174.62	0.127
174.86	0.102
175.1	0.064
175.35	0.047
175.59	0.035
175.83	0.013
176.07	0.031
176.31	0.034
176.55	0.034
176.8	0.042
177.04	0.063
177.3	0.044
177.54	0.037
177.78	0.043
178.03	0.042
178.27	0.05
178.51	0.08
178.75	0.103
178.99	0.113
179.23	0.107
179.47	0.13
179.71	0.132
179.95	0.126
180.19	0.104
180.43	0.129
180.67	0.102
180.91	0.086
181.39	0.065
181.63	0.033
181.87	0.037
182.11	0.01
182.35	0.009
182.59	0.024
182.83	0.048
183.07	0.054
183.31	0.066
183.55	0.023
183.79	0.012
184.03	0.014
184.27	0.025
184.51	0.024
184.74	0.028
184.98	0.028
185.22	0.045
185.48	0.031
185.72	0.019
185.96	-0.01
186.2	0.003
186.44	0.015
186.69	0.015
186.95	0.03
187.19	0.05
187.43	0.047
187.68	0.049
187.92	0.055
188.16	0.042
188.64	0.06
188.88	0.07
189.12	0.075
189.36	0.091
189.6	0.086
189.84	0.11
190.08	0.141
190.32	0.138
190.56	0.159
190.8	0.124
191.04	0.117
191.28	0.074
191.52	0.052
191.76	0.008
192	0.019
192.24	0.005
192.47	0.009
192.71	-0.001
192.95	0.005
193.19	0.005
193.43	-0.002
193.67	0.033
193.91	0.019
194.39	0.019
194.63	0.018
194.87	0.008
195.11	-0.014
195.35	0.008
195.61	-0.004
195.85	0.006
196.09	0.026
196.33	0.026
196.56	0.017
196.82	0.025
197.07	0.004
197.31	0.021
197.57	0.01
197.81	0.025
198.05	-0.001
198.29	0
198.53	-0.007
198.77	0.022
199.01	0.032
199.25	0.02
199.49	0.017
199.73	0.019
199.97	0.024
200.22	0
200.46	0.021
200.7	0.028
200.94	0.02
201.18	0.001
201.42	0.029
201.66	0.036
202.14	0.043
202.38	0.052
202.63	0.053
202.87	0.065
203.11	0.104
203.37	0.08
203.62	0.076
203.86	0.053
204.1	0.063
204.34	0.055
204.58	0.058
204.82	0.06
205.06	0.043
205.3	0.01
205.54	-0.022
205.78	-0.015
206.02	-0.015
206.26	0.022
206.5	0.01
206.74	0.013
206.98	0.012
207.22	0.02
207.46	0.014
207.7	0.052
207.94	0.068
208.18	0.086
208.41	0.073
208.89	0.056
209.13	0.052
209.37	0.013
209.61	-0.025
209.85	-0.006
210.09	-0.019
210.33	0.009
210.57	0.004
210.81	0.004
211.05	-0.007
211.29	-0.007
211.53	0
211.77	0.02
212.01	0.026
212.25	0.02
212.49	0.015
212.73	0.02
212.97	0.028
213.21	0.024
213.45	0.034
213.69	0.035
213.93	0.021
214.17	0.011
214.41	0.028
214.89	0.01
215.13	0.03
215.37	0.006
215.61	0.01
215.85	-0.006
216.09	-0.001
216.32	0.003
216.56	0.02
216.8	0.007
217.04	0.01
217.28	0.011
217.52	0.017
217.76	0.008
218	-0.013
218.24	0.002
218.48	-0.001
218.72	-0.009
218.96	-0.003
219.2	0.006
219.44	0.003
219.68	0.023
219.92	0.014
220.16	0.011
220.64	-0.009
220.88	0.008
221.12	-0.001
221.36	-0.007
221.6	-0.02
221.84	0.002
222.08	-0.003
222.32	0.033
222.56	0.022
222.8	0.028
223.04	0.008
223.28	0.017
223.52	0.006
223.76	0.004
224	-0.004
224.23	0.003
224.47	0.042
224.71	0.041
224.95	0.052
225.19	0.032
225.43	0.013
225.67	0.016
225.91	0.022
226.39	-0.01
226.63	0.001
226.87	0.01
227.11	0.034
227.35	0.015
227.59	0.034
227.83	0.019
228.07	0.029
228.32	0.021
228.58	0.016
228.82	0.014
229.06	0.02
229.3	0.031
229.54	0.019
229.78	-0.013
230.02	-0.028
230.26	-0.004
230.51	-0.006
230.75	-0.003
230.99	-0.006
231.23	0.008
231.47	0.012
231.71	0.013
231.95	-0.003
232.19	-0.013
232.43	-0.018
232.67	-0.004
232.91	-0.003
233.4	0.044
233.64	0.049
233.88	0.107
234.12	0.087
234.36	0.098
234.6	0.087
234.84	0.09
235.08	0.072
235.32	0.064
235.56	0.04
235.8	0.037
236.04	0.026
236.28	0.024
236.52	0.042
236.76	0.026
237	0.023
237.24	0.03
237.48	0.044
237.72	0.029
237.96	0.021
238.2	-0.02
238.44	-0.02
238.68	-0.028
238.92	-0.006
239.4	-0.005
239.64	0
239.87	-0.013
240.11	-0.008
240.35	-0.066
240.59	-0.06
240.83	-0.05
241.07	0.002
241.31	0.014
241.55	0.01
241.79	0.015
242.03	0.018
242.27	-0.003
242.53	-0.011
242.77	-0.011
243.01	-0.015
243.25	-0.017
243.49	-0.006
243.73	-0.008
243.96	0.007
244.2	0.006
244.44	0.028
244.68	-0.041
244.92	-0.18
245.16	-0.104
245.42	-0.087
245.67	-0.073
245.93	-0.075
246.17	-0.059
246.41	-0.048
246.89	-0.077
247.13	-0.063
247.37	-0.066
247.61	-0.125
247.84	-0.231
248.08	-0.214
248.32	-0.131
248.56	-0.155
248.8	-0.127
249.04	-0.133
249.28	-0.161
249.52	-0.182
249.76	-0.132
250	-0.122
250.24	-0.155
250.48	-0.142
250.72	-0.155
250.96	-0.102
251.2	-0.08
251.44	-0.09
251.68	-0.125
251.92	-0.094
252.16	-0.056
252.64	-0.008
252.88	-0.002
253.12	-0.018
253.36	-0.022
253.6	-0.053
253.84	-0.1
254.08	-0.094
254.32	-0.1
254.56	-0.062
254.8	-0.082
255.04	-0.093
255.28	-0.085
255.52	-0.131
255.75	-0.188
255.99	-0.175
256.23	-0.178
256.47	-0.164
256.71	-0.137
256.95	-0.178
257.19	-0.157
257.43	-0.16
257.67	-0.135
257.91	-0.14
258.39	-0.128
258.63	-0.141
258.87	-0.151
259.11	-0.186
259.35	-0.162
259.59	-0.174
259.83	-0.167
260.07	-0.175
260.31	-0.154
260.55	-0.153
260.79	-0.121
261.03	-0.12
261.27	-0.157
261.51	-0.152
261.75	-0.152
261.99	-0.212
262.23	-0.199
262.47	-0.173
262.71	-0.174
262.95	-0.161
263.19	-0.187
263.43	-0.155
263.66	-0.106
264.14	-0.084
264.38	-0.105
264.62	-0.098
264.86	-0.108
265.1	-0.104
265.34	-0.072
265.58	-0.027
265.82	-0.048
266.06	-0.041
266.3	-0.017
266.54	-0.038
266.78	-0.081
267.02	-0.08
267.26	-0.059
267.5	-0.04
267.74	-0.067
267.98	-0.069
268.22	-0.089
268.46	-0.064
268.7	-0.079
268.94	-0.048
269.18	-0.029
269.42	-0.039
269.66	-0.053
270.14	-0.119
270.38	-0.142
270.62	-0.139
270.86	-0.193
271.1	-0.215
271.34	-0.154
271.57	-0.127
271.81	-0.133
272.05	-0.149
272.31	-0.151
272.55	-0.149
272.79	-0.16
273.03	-0.177
273.27	-0.146
273.52	-0.205
273.76	-0.204
274	-0.164
274.26	-0.144
274.5	-0.144
274.74	-0.212
274.98	-0.269
275.22	-0.261
275.45	-0.241
275.69	-0.253
275.93	-0.249
276.17	-0.227
276.41	-0.214
276.67	-0.227
276.91	-0.176
277.39	-0.143
277.63	-0.165
277.87	-0.182
278.11	-0.192
278.35	-0.175
278.59	-0.168
278.83	-0.145
279.07	-0.152
279.31	-0.193
279.54	-0.2
279.78	-0.184
280.02	-0.141
280.26	-0.137
280.5	-0.119
280.74	-0.133
280.98	-0.178
281.22	-0.218
281.46	-0.249
281.7	-0.194
281.94	-0.165
282.2	-0.153
282.44	-0.18
282.68	-0.196
282.92	-0.247
283.39	-0.231
283.63	-0.233
283.87	-0.2
284.11	-0.232
284.35	-0.226
284.59	-0.189
284.83	-0.147
285.07	-0.173
285.31	-0.172
285.57	-0.171
285.81	-0.169
286.06	-0.127
286.3	-0.12
286.56	-0.138
286.8	-0.127
287.04	-0.099
287.27	-0.071
287.51	-0.081
287.75	-0.121
287.99	-0.122
288.23	-0.111
288.47	-0.12
288.71	-0.102
288.95	-0.102
289.19	-0.189
289.43	-0.22
289.67	-0.179
289.91	-0.116
290.39	-0.098
290.63	-0.063
290.87	-0.032
291.11	-0.016
291.35	-0.018
291.59	-0.007
291.83	-0.029
292.07	0.004
292.31	-0.005
292.55	0.01
292.79	0.017
293.03	-0.005
293.27	-0.027
293.51	-0.023
293.75	0.004
293.99	-0.014
294.23	0.024
294.47	0.051
294.71	0.065
294.95	0.054
295.18	0.046
295.42	0.068
295.66	0.095
296.14	0.116
296.38	0.143
296.62	0.154
296.86	0.18
297.1	0.174
297.34	0.216
297.58	0.205
297.82	0.2
298.06	0.178
298.3	0.183
298.54	0.185
298.78	0.23
299.02	0.305
299.26	0.326
299.5	0.329
299.74	0.303
299.98	0.256
300.22	0.275
300.46	0.323
300.7	0.295
300.94	0.349
301.18	0.386
301.42	0.377
301.66	0.387
302.14	0.442
302.39	0.532
302.63	0.576
302.87	0.526
303.11	0.543
303.36	0.569
303.6	0.612
303.86	0.618
304.1	0.638
304.35	0.666
304.59	0.74
304.83	0.766
305.07	0.811
305.31	0.867
305.55	0.911
305.79	0.965
306.03	0.972
306.27	0.987
306.51	0.968
306.75	0.969
306.99	0.974
307.23	0.991
307.47	1.006
307.71	0.978
307.95	0.985
308.19	1.026
308.43	0.99
308.67	0.933
308.91	0.918
309.39	0.959
309.63	0.962
309.87	1.016
310.11	1.042
310.35	1.081
310.59	1.117
310.82	1.128
311.06	1.118
311.3	1.101
311.54	1.065
311.78	1.047
312.02	1.082
312.26	1.12
312.5	1.14
312.74	1.204
312.98	1.211
313.22	1.166
313.46	1.127
313.7	1.066
313.94	1.05
314.18	1.061
314.42	1.064
314.66	1.068
315.14	1.126
315.38	1.134
315.62	1.177
315.86	1.127
316.1	1.168
316.34	1.136
316.58	1.144
316.82	1.115
317.06	1.149
317.3	1.188
317.54	1.173
317.78	1.154
318.02	1.162
318.26	1.215
318.5	1.256
318.73	1.281
318.97	1.252
319.21	1.273
319.45	1.276
319.69	1.239
319.93	1.314
320.17	1.395
320.41	1.394
320.89	1.414
321.13	1.411
321.37	1.416
321.61	1.401
321.85	1.521
322.09	1.581
322.33	1.597
322.57	1.591
322.81	1.615
323.05	1.621
323.29	1.657
323.53	1.674
323.77	1.654
324.01	1.643
324.25	1.633
324.49	1.595
324.73	1.59
324.97	1.584
325.21	1.569
325.45	1.562
325.69	1.53
325.93	1.53
326.17	1.492
326.64	1.527
326.88	1.49
327.12	1.546
327.36	1.559
327.6	1.628
327.84	1.653
328.08	1.657
328.32	1.647
328.56	1.653
328.8	1.645
329.04	1.657
329.28	1.623
329.52	1.614
329.76	1.626
330	1.637
330.24	1.63
330.48	1.638
330.73	1.66
330.97	1.708
331.21	1.789
331.45	1.806
331.69	1.793
331.93	1.825
332.17	1.866
332.43	1.864
332.67	1.871
332.92	1.874
333.18	1.855
333.42	1.827
333.9	1.849
334.14	1.768
334.37	1.733
334.61	1.741
334.85	1.8
335.09	1.812
335.33	1.858
335.57	1.914
335.81	1.957
336.05	2.001
336.29	2.038
336.53	2.006
336.77	1.922
337.01	1.957
337.25	1.954
337.49	1.968
337.73	2
337.97	2.01
338.21	2.039
338.45	2.075
338.69	2.079
338.93	2.123
339.17	2.116
339.41	2.126
339.89	2.11
340.13	2.133
340.37	2.149
340.61	2.19
340.85	2.204
341.09	2.213
341.33	2.203
341.57	2.211
341.81	2.177
342.05	2.164
342.28	2.147
342.52	2.162
342.76	2.194
343	2.18
343.24	2.187
343.48	2.21
343.72	2.228
343.96	2.252
344.2	2.237
344.44	2.238
344.68	2.233
344.92	2.22
345.16	2.18
345.64	2.146
345.88	2.2
346.12	2.204
346.36	2.254
346.6	2.294
346.84	2.283
347.08	2.243
347.32	2.245
347.56	2.222
347.8	2.207
348.04	2.224
348.28	2.26
348.52	2.273
348.76	2.289
349	2.278
349.24	2.297
349.48	2.32
349.72	2.324
349.95	2.323
350.19	2.361
350.43	2.364
350.67	2.314
350.91	2.268
351.39	2.222
351.63	2.215
351.87	2.241
352.11	2.293
352.35	2.334
352.59	2.374
352.83	2.368
353.07	2.381
353.31	2.378
353.55	2.36
353.79	2.311
354.03	2.336
354.27	2.353
354.51	2.371
354.75	2.4
354.99	2.382
355.23	2.379
355.47	2.404
355.71	2.387
355.95	2.377
356.19	2.398
356.43	2.396
356.67	2.399
356.91	2.394
357.39	2.413
357.63	2.418
357.86	2.461
358.1	2.455
358.34	2.463
358.58	2.454
358.82	2.473
359.06	2.469
359.3	2.476
359.54	2.45
359.78	2.441
360.02	2.443
360.26	2.427
360.5	2.461
360.74	2.493
360.98	2.493
361.22	2.522
361.46	2.499
361.7	2.499
361.94	2.505
362.18	2.528
362.42	2.521
362.66	2.491
363.14	2.492
363.38	2.494
363.62	2.49
363.86	2.475
364.1	2.489
364.34	2.496
364.58	2.541
364.82	2.509
365.06	2.485
365.3	2.499
365.54	2.519
365.77	2.551
366.01	2.554
366.25	2.549
366.49	2.54
366.73	2.543
366.97	2.542
367.21	2.509
367.45	2.544
367.69	2.542
367.93	2.561
368.17	2.541
368.41	2.492
368.89	2.495
369.13	2.451
369.37	2.461
369.61	2.468
369.85	2.455
370.09	2.454
370.33	2.467
370.57	2.496
370.81	2.533
371.05	2.531
371.29	2.505
371.53	2.499
371.77	2.506
372.01	2.523
372.25	2.55
372.49	2.551
372.73	2.56
372.97	2.523
373.21	2.508
373.45	2.484
373.68	2.488
373.92	2.49
374.16	2.508
374.64	2.521
374.88	2.573
375.12	2.605
375.36	2.586
375.6	2.602
375.84	2.551
376.08	2.53
376.32	2.543
376.56	2.562
376.8	2.541
377.04	2.567
377.28	2.554
377.52	2.574
377.76	2.554
378	2.543
378.24	2.555
378.48	2.586
378.72	2.593
378.96	2.589
379.2	2.565
379.44	2.62
379.68	2.635
379.92	2.682
380.16	2.698
380.64	2.73
380.88	2.69
381.12	2.661
381.36	2.615
381.59	2.595
381.83	2.614
382.07	2.613
382.31	2.654
382.55	2.675
382.79	2.706
383.03	2.676
383.27	2.707
383.51	2.718
383.75	2.694
383.99	2.668
384.23	2.656
384.47	2.65
384.71	2.642
384.95	2.656
385.19	2.659
385.43	2.661
385.67	2.653
385.91	2.63
386.39	2.625
386.63	2.549
386.87	2.541
387.11	2.579
387.36	2.573
387.62	2.612
387.86	2.612
388.1	2.655
388.35	2.614
388.59	2.614
388.85	2.61
389.1	2.634
389.34	2.623
389.58	2.661
389.82	2.665
390.06	2.668
390.3	2.691
390.54	2.736
390.78	2.729
391.02	2.755
391.26	2.757
391.5	2.789
391.75	2.751
391.99	2.79
392.23	2.796
392.47	2.808
392.71	2.793
392.97	2.729
393.21	2.707
393.46	2.725
393.7	2.778
393.94	2.774
394.18	2.756
394.42	2.729
394.66	2.753
395.14	2.796
395.38	2.803
395.62	2.764
395.86	2.759
396.1	2.743
396.34	2.755
396.58	2.754
396.82	2.762
397.06	2.762
397.29	2.777
397.53	2.736
397.77	2.772
398.01	2.695
398.25	2.691
398.49	2.704
398.73	2.677
398.97	2.661
399.21	2.688
399.45	2.675
399.69	2.658
399.93	2.619
400.17	2.573
400.41	2.608
400.89	2.615
401.13	2.622
401.37	2.622
401.61	2.63
401.85	2.627
402.09	2.618
402.33	2.645
402.57	2.676
402.82	2.682
403.06	2.686
403.3	2.646
403.54	2.609
403.78	2.603
404.02	2.656
404.26	2.64
404.5	2.652
404.74	2.695
404.98	2.66
405.22	2.616
405.46	2.601
405.7	2.609
405.94	2.583
406.18	2.578
406.43	2.565
406.69	2.57
406.93	2.569
407.18	2.559
407.42	2.583
407.66	2.557
408.14	2.583
408.38	2.616
408.62	2.683
408.86	2.701
409.1	2.709
409.34	2.757
409.58	2.748
409.82	2.809
410.06	2.838
410.3	2.838
410.54	2.81
410.78	2.846
411.02	2.823
411.26	2.817
411.5	2.85
411.74	2.856
411.98	2.847
412.22	2.828
412.46	2.859
412.7	2.848
412.94	2.819
413.17	2.804
413.41	2.822
413.89	2.842
414.13	2.859
414.37	2.794
414.61	2.783
414.85	2.774
415.11	2.81
415.35	2.838
415.59	2.86
415.83	2.855
416.08	2.864
416.34	2.854
416.59	2.868
416.83	2.866
417.07	2.905
417.31	2.937
417.55	2.924
417.79	2.922
418.03	2.886
418.27	2.864
418.51	2.873
418.75	2.923
418.99	2.941
419.23	2.937
419.47	2.912
419.71	2.898
419.95	2.917
420.19	2.908
420.43	2.94
420.67	2.957
421.14	2.966
421.38	2.946
421.62	2.912
421.86	2.883
422.1	2.849
422.34	2.894
422.58	2.914
422.82	2.963
423.06	2.948
423.3	2.937
423.54	2.96
423.78	2.925
424.02	2.887
424.26	2.858
424.5	2.879
424.74	2.895
424.98	2.948
425.22	2.955
425.46	2.955
425.71	2.973
425.97	2.955
426.21	2.962
426.46	2.907
426.7	2.867
426.94	2.899
427.2	2.915
427.44	2.939
427.68	2.865
427.92	2.855
428.4	2.853
428.64	2.867
428.87	2.853
429.11	2.838
429.35	2.803
429.59	2.804
429.83	2.858
430.07	2.951
430.31	2.942
430.55	2.928
430.79	2.854
431.03	2.812
431.27	2.813
431.51	2.796
431.75	2.8
431.99	2.826
432.23	2.833
432.47	2.849
432.71	2.84
432.95	2.803
433.19	2.803
433.43	2.75
433.67	2.756
433.91	2.791
434.39	2.901
434.63	2.93
434.87	2.933
435.11	2.897
435.35	2.934
435.59	2.935
435.83	2.939
436.07	2.895
436.31	2.882
436.55	2.874
436.78	2.898
437.02	2.929
437.26	2.913
437.5	2.913
437.74	2.885
437.98	2.9
438.22	2.958
438.46	3.001
438.7	2.982
438.94	2.983
439.18	2.949
439.42	2.923
439.66	2.897
440.14	2.95
440.38	2.939
440.62	2.95
440.86	2.972
441.1	2.985
441.34	2.956
441.58	2.945
441.82	2.92
442.06	2.946
442.3	2.934
442.54	2.959
442.78	3.005
443.02	3.024
443.26	2.994
443.5	2.946
443.74	2.912
443.98	2.94
444.22	2.953
444.45	2.954
444.69	2.944
444.93	2.943
445.17	2.957
445.41	2.94
445.89	2.957
446.13	2.95
446.37	2.974
446.61	2.975
446.85	2.959
447.09	2.937
447.33	2.961
447.57	2.943
447.81	2.949
448.05	2.944
448.29	2.946
448.53	2.908
448.77	2.907
449.01	2.897
449.25	2.957
449.49	2.982
449.73	3.035
449.97	3.013
450.21	2.983
450.45	2.964
450.69	2.972
450.93	2.984
451.17	2.985
451.41	2.974
451.89	2.908
452.13	2.834
452.37	2.8
452.6	2.836
452.84	2.82
453.08	2.8
453.32	2.759
453.56	2.656
453.8	2.634
454.04	2.716
454.28	2.789
454.52	2.759
454.78	2.76
455.03	2.801
455.27	2.868
455.51	2.884
455.75	2.905
455.99	2.857
456.25	2.801
456.48	2.807
456.72	2.824
456.98	2.827
457.22	2.89
457.46	2.872
457.7	2.855
457.94	2.863
458.18	2.859
458.43	2.84
458.67	2.88
458.91	2.917
459.39	2.93
459.65	2.878
459.89	2.867
460.13	2.871
460.36	2.899
460.6	2.935
460.84	2.972
461.08	2.971
461.32	2.977
461.56	2.939
461.8	2.882
462.06	2.818
462.3	2.834
462.55	2.859
462.79	2.86
463.03	2.841
463.27	2.879
463.53	2.895
463.78	2.889
464.04	2.895
464.27	2.88
464.53	2.88
464.77	2.836
465.01	2.768
465.25	2.782
465.49	2.803
465.73	2.776
465.97	2.769
466.21	2.812
466.45	2.817
466.69	2.808
466.93	2.823
467.17	2.836
467.65	2.883
467.89	2.868
468.12	2.874
468.36	2.877
468.6	2.909
468.84	2.925
469.08	2.927
469.32	2.938
469.56	2.939
469.8	2.937
470.04	2.891
470.28	2.9
470.52	2.893
470.76	2.903
471	2.864
471.24	2.802
471.48	2.752
471.72	2.78
471.96	2.794
472.2	2.807
472.44	2.821
472.68	2.894
472.92	2.949
473.16	2.943
473.64	2.892
473.88	2.92
474.12	2.92
474.36	2.969
474.6	2.981
474.84	2.965
475.08	2.952
475.32	2.926
475.56	2.905
475.8	2.919
476.03	2.963
476.27	3.018
476.51	3.076
476.75	3.027
476.99	2.996
477.23	2.98
477.47	2.985
477.71	2.998
477.95	3.006
478.19	3.012
478.43	3.031
478.67	3.05
478.91	3.043
479.39	2.975
479.63	2.971
479.87	2.964
480.11	3.002
480.35	3.035
480.59	3.031
480.83	2.998
481.07	2.959
481.31	2.967
481.55	2.965
481.79	2.927
482.03	2.907
482.27	2.935
482.51	2.897
482.75	2.918
482.99	2.925
483.23	2.908
483.47	2.937
483.71	3
483.94	2.992
484.18	2.987
484.42	2.983
484.66	2.983
485.14	2.964
485.38	3.005
485.62	2.983
485.86	3.007
486.1	2.984
486.34	2.935
486.58	2.905
486.82	2.923
487.06	2.943
487.3	2.95
487.54	2.926
487.78	2.901
488.02	2.959
488.26	2.949
488.5	2.939
488.74	2.923
488.98	2.987
489.22	2.994
489.46	2.972
489.7	2.961
489.94	2.951
490.18	2.933
490.42	2.892
490.66	2.858
491.14	2.871
491.38	2.871
491.62	2.863
491.85	2.814
492.09	2.853
492.33	2.874
492.57	2.938
492.81	3.003
493.05	3.029
493.29	3.045
493.53	3.012
493.77	2.974
494.01	2.92
494.25	2.945
494.49	2.955
494.73	2.961
494.97	2.92
495.21	2.914
495.45	2.918
495.69	2.955
495.93	2.963
496.17	2.954
496.41	2.938
496.89	2.948
497.13	2.94
497.37	2.966
497.61	2.976
497.85	3.004
498.09	3.001
498.33	3.016
498.57	3.035
498.81	3.032
499.05	3.04
499.29	3.048
499.53	3.047
[truncated: 10,110 more rows]

## Sheet: Fig. 4b
Π0 (mN/m)	∆Π (mN/m)
29.5	1.9
28.4	1.8
19.1	5.1
15.6	5.8
22.8	4.3
25	3.2
20.1	4.9
27	2.5
23	4.2
17.9	5.4
16.7	6.5

[truncated: 13 more sheets: Fig. 4f, Fig.5a, Fig. 5b, Fig.5c, Fig. 6a, Fig. 6b, Fig. 6c, Fig. 6d, Fig. 6e, Fig. 6f, SFig. 1, SFig. 5a, SFig. 5b]
